# Supplementary material for: {Co(HBpe)2}(V4O12): pedal motion induced order–disorder P1→C1 transition and disrupted C1→C2/m displacive transition due to thermal instability
Source: Royal Society of Chemistry journal article supplement (doi:10.1039/c1ce05418j), 2011-01-01
Supplement: c1ce05418j.pdf [file c1ce05418j.pdf]

# {Co(HBpe)<sub>2</sub>}V<sub>4</sub>O<sub>12</sub>: Pedal Motion Induced Order-Disorder P-1 → C-1 Transition and Disrupted C-1 → C2/m Displacive Transition due to Thermal Instability.

<sup>a</sup>Roberto Fernández de Luis, <sup>a</sup>M. Karmele Urtiaga, <sup>b</sup>José L. Mesa, <sup>a</sup>Joseba Orive Gómez de Segura,  
<sup>b</sup>Teófilo Rojo, <sup>\*a</sup>María I. Arriortua

<sup>a</sup>Departamento de Mineralogía y Petrología and <sup>b</sup>Departamento de Química Inorgánica, Facultad de  
Ciencia y Tecnología. Universidad del País Vasco UPV/EHU, Apdo. 644, E-48080 Bilbao. Spain.

roberto.fernandez@ehu.es, karmele.urtiaga@ehu.es, joseluis.mesa@ehu.es, joseba.orive@ehu.es,  
teo.rojo@ehu.es, maribel.arriortua@ehu.es

RECEIVED DATE (to be automatically inserted after your manuscript is accepted if required  
according to the journal that you are submitting your paper to)

\*Corresponding Author: [maribel.arriortua@ehu.es](mailto:maribel.arriortua@ehu.es) - Phone: 34-946012162, Fax: 34-946013500.

## SUPPORTING INFORMATION

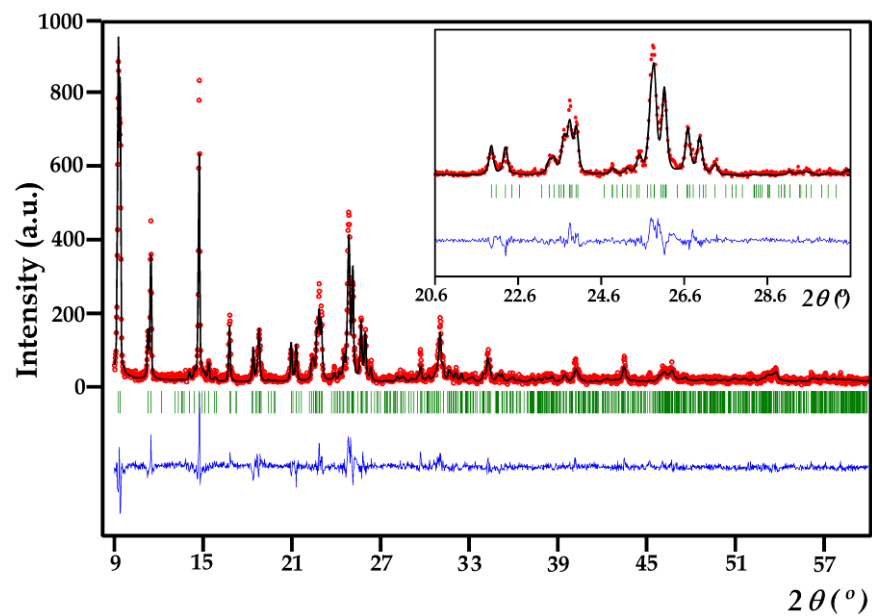

**Figure S1.** Rietveld refinement Red points: Experimental data; Black line: Calculated, Green bars: Reflection positions, Blue line: Experimental-Calculated.

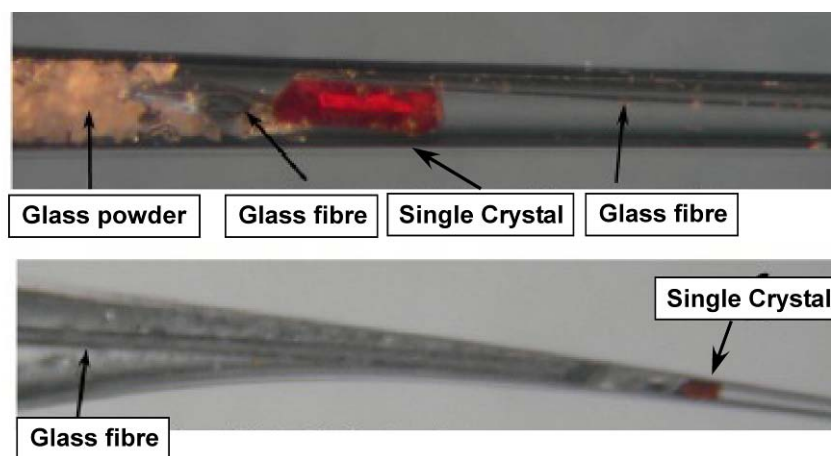

**Figure S2.** Device to measure the data single X-ray diffraction data at high temperatures.

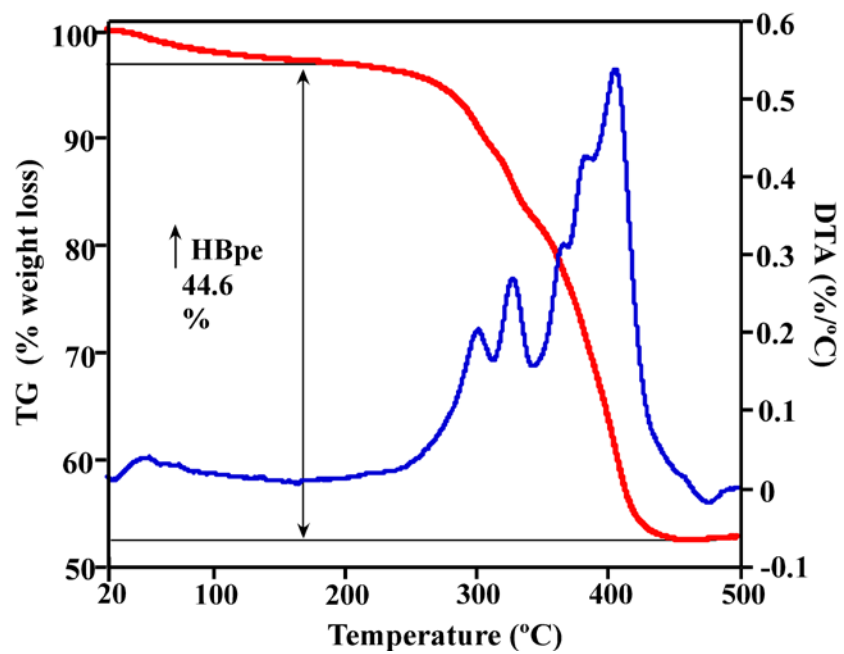

Figure S3. TGA and ATD Curves.

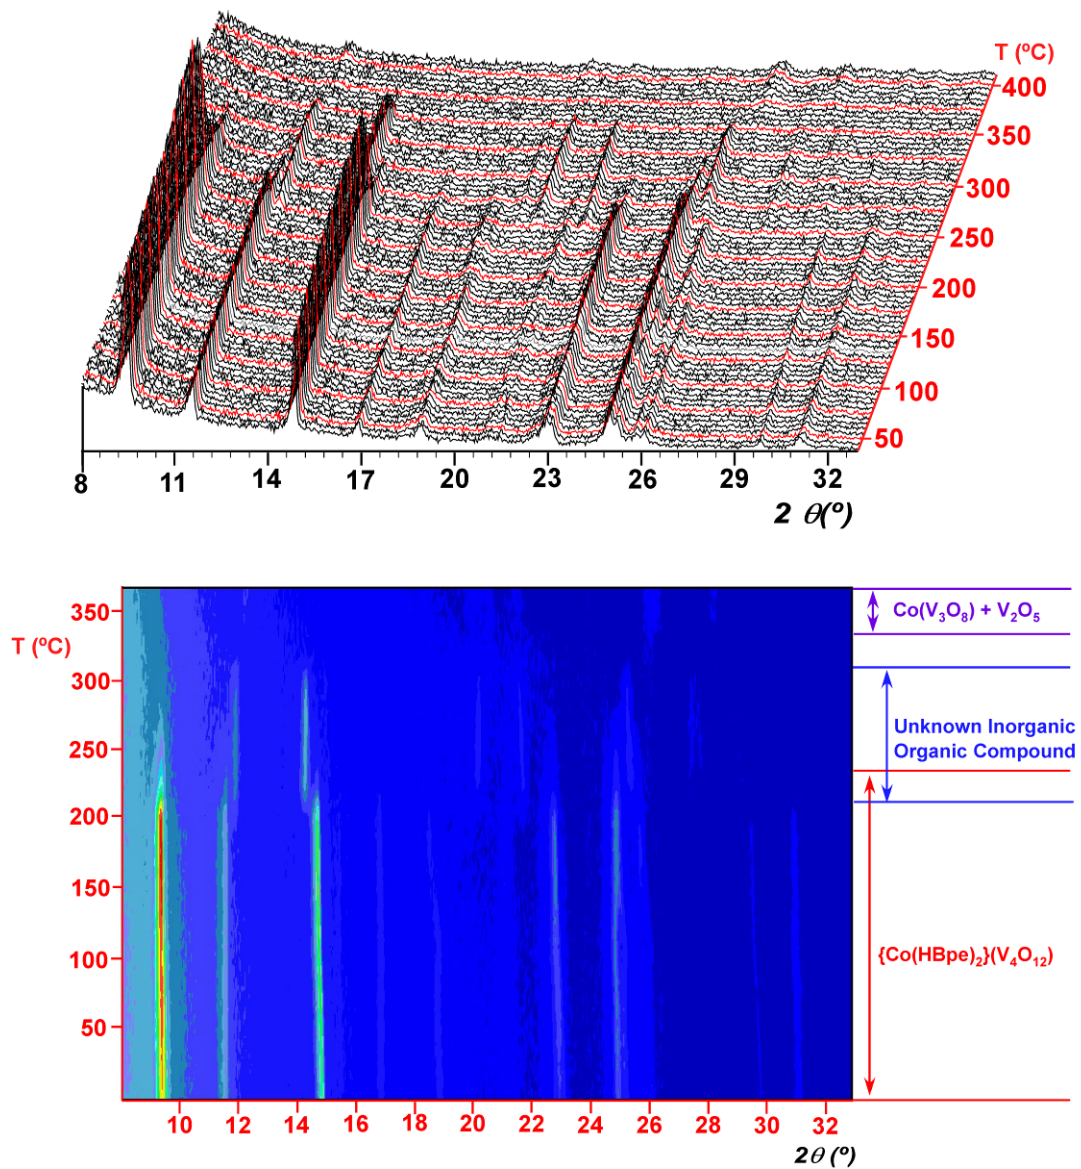

Figure S4. Thermodiffractometry experiment.

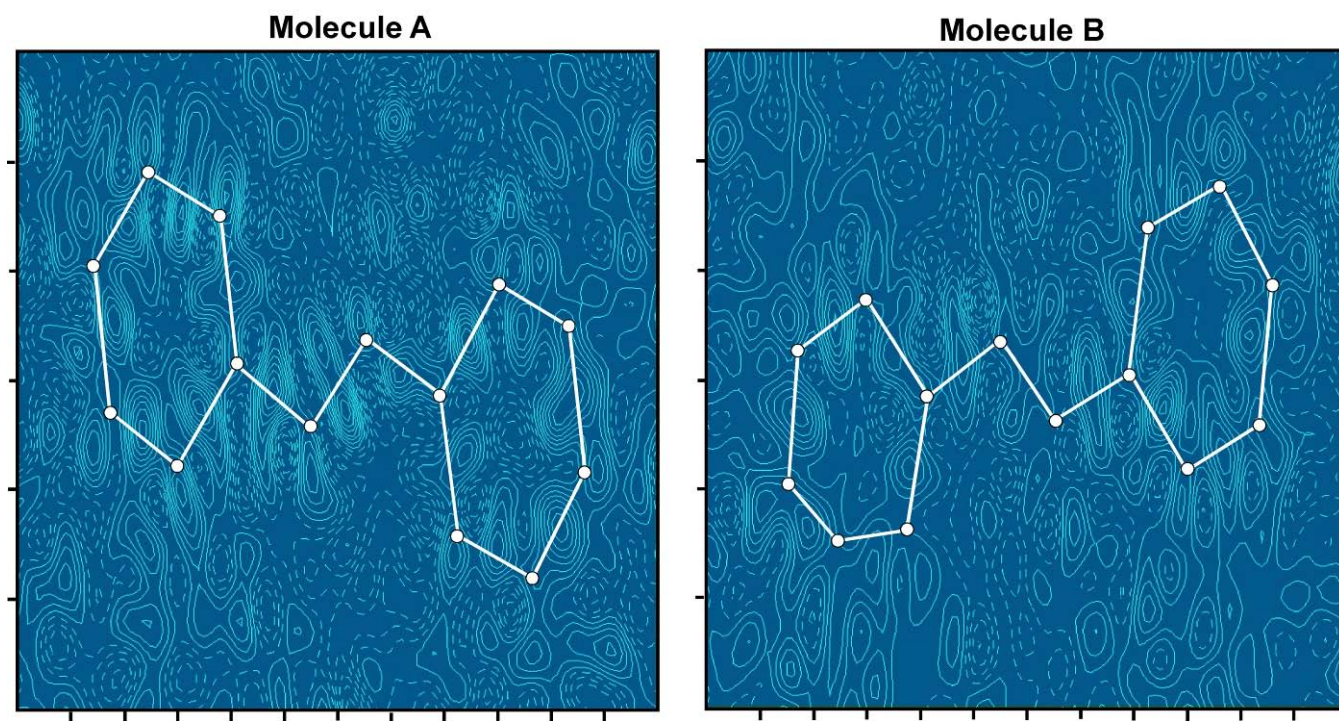

**Figure S5.** Difference electron density maps of the two crystallographically independent HBpe molecules at 100K. Minimum electron density:  $-0.60 \text{ e}\text{\AA}^{-3}$ . Maximum electron density:  $0.60 \text{ e}\text{\AA}^{-3}$ .

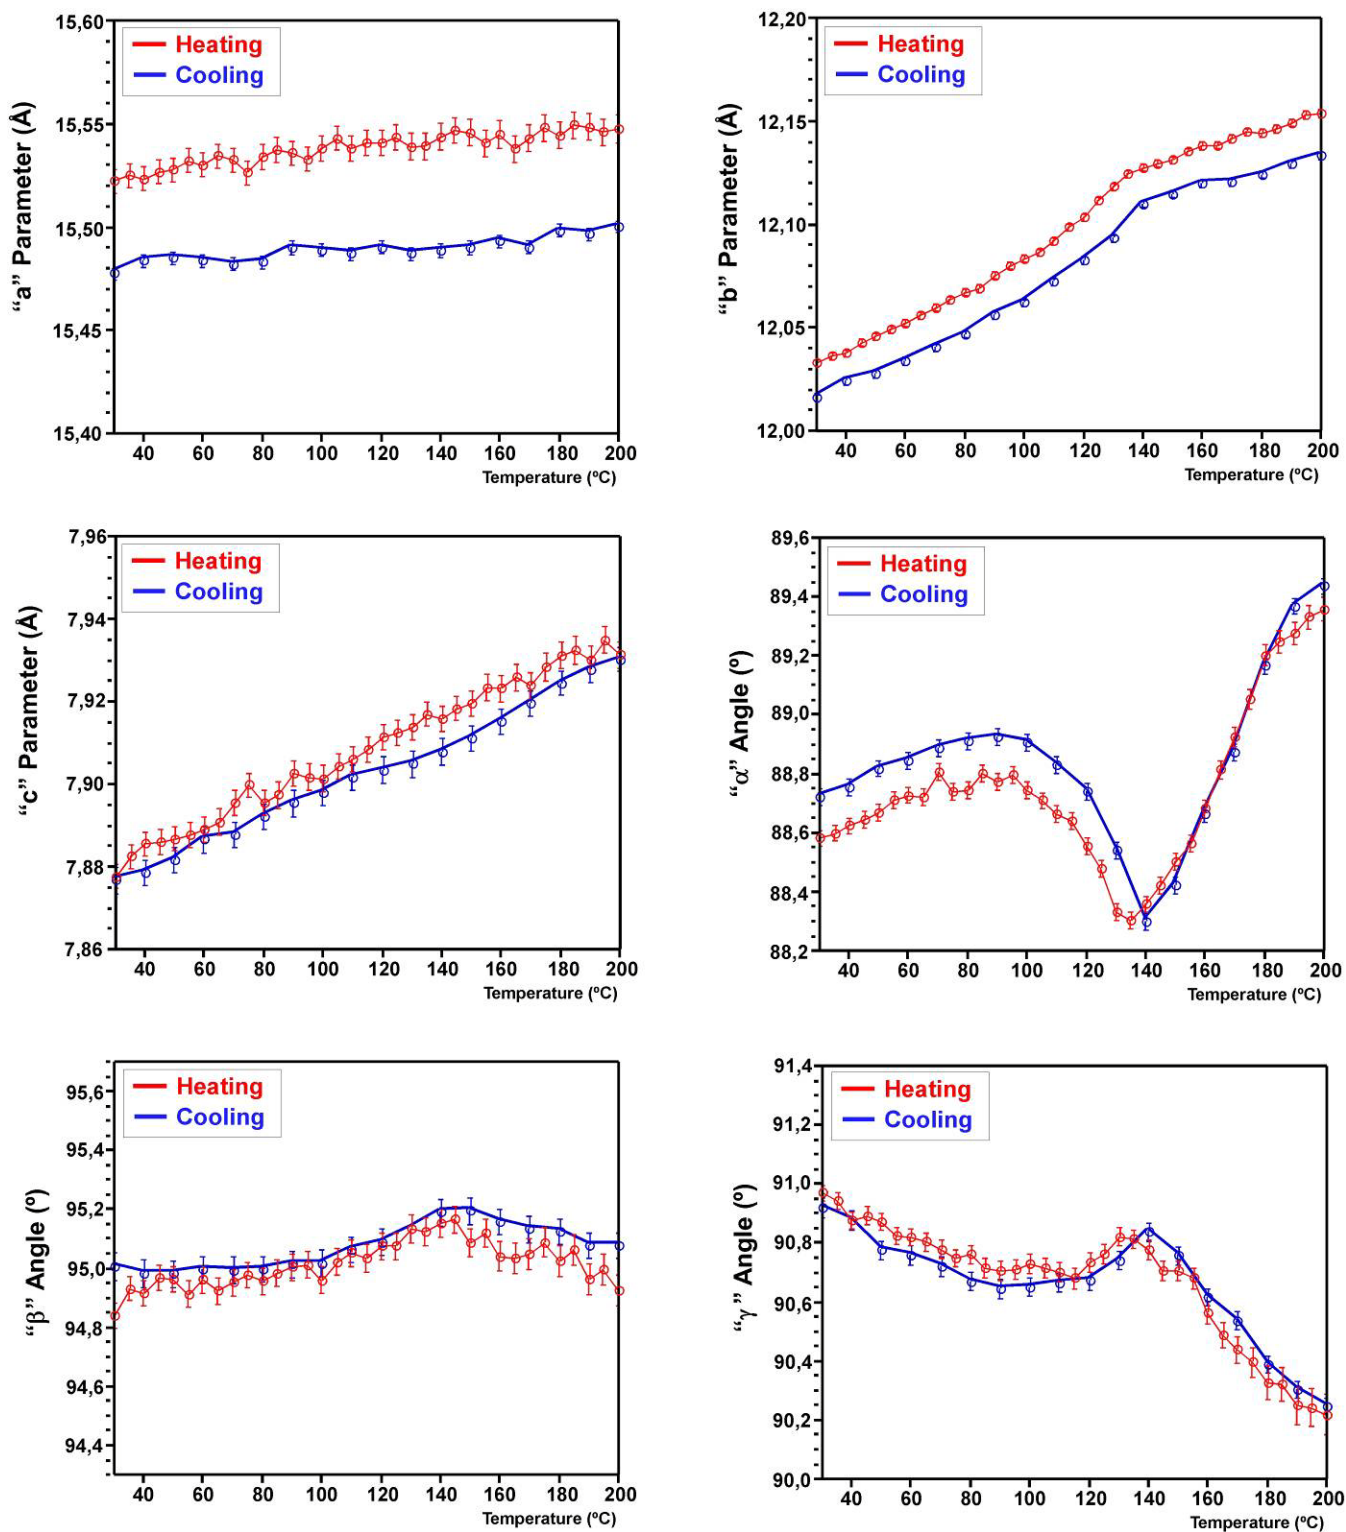

Figure S6. Comparison between the thermal evolution of the cell parameters on cooling (blue lines and points) and heating (red lines and points).

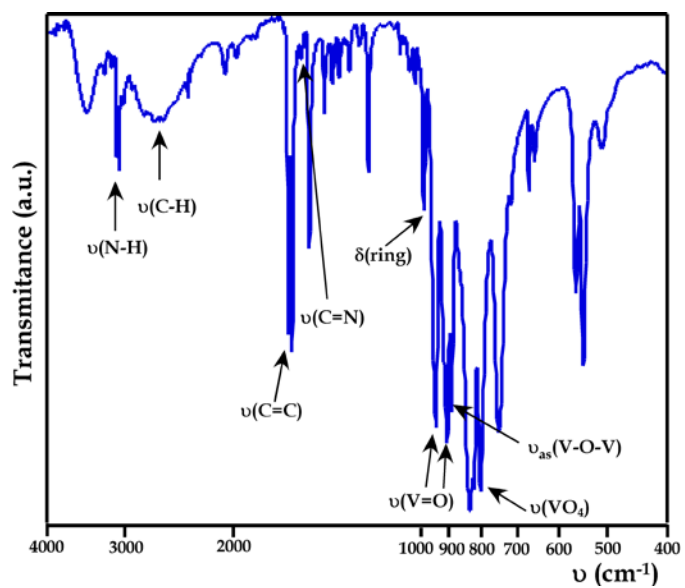

Figure S7. IR spectrum.

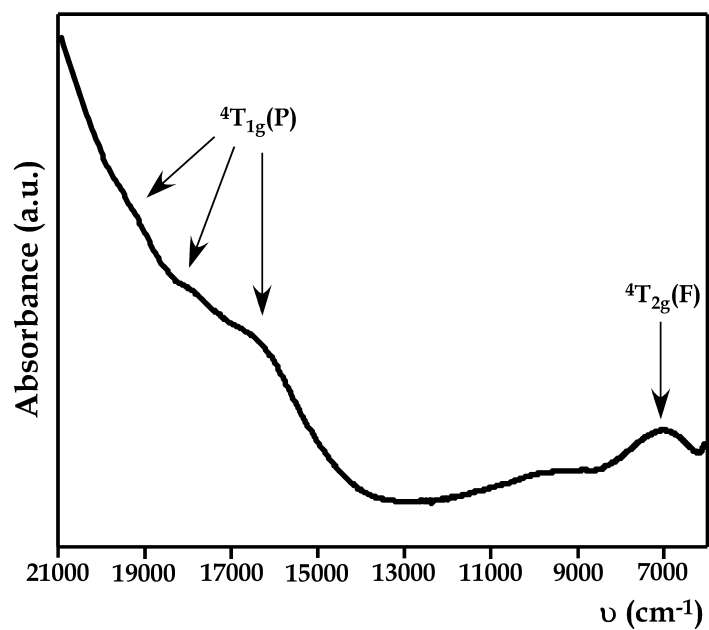

Figure S8. UV-spectrum.
